# Supplementary material for: Deficient methylation and formylation of mt-tRNAMet wobble cytosine in a patient carrying mutations in NSUN3
Source: PubMed Central journal article supplement (PMC4931328; doi:10.1038/ncomms12039), 2016-06-30
Supplement: ncomms12039-s1.pdf [file ncomms12039-s1.pdf]

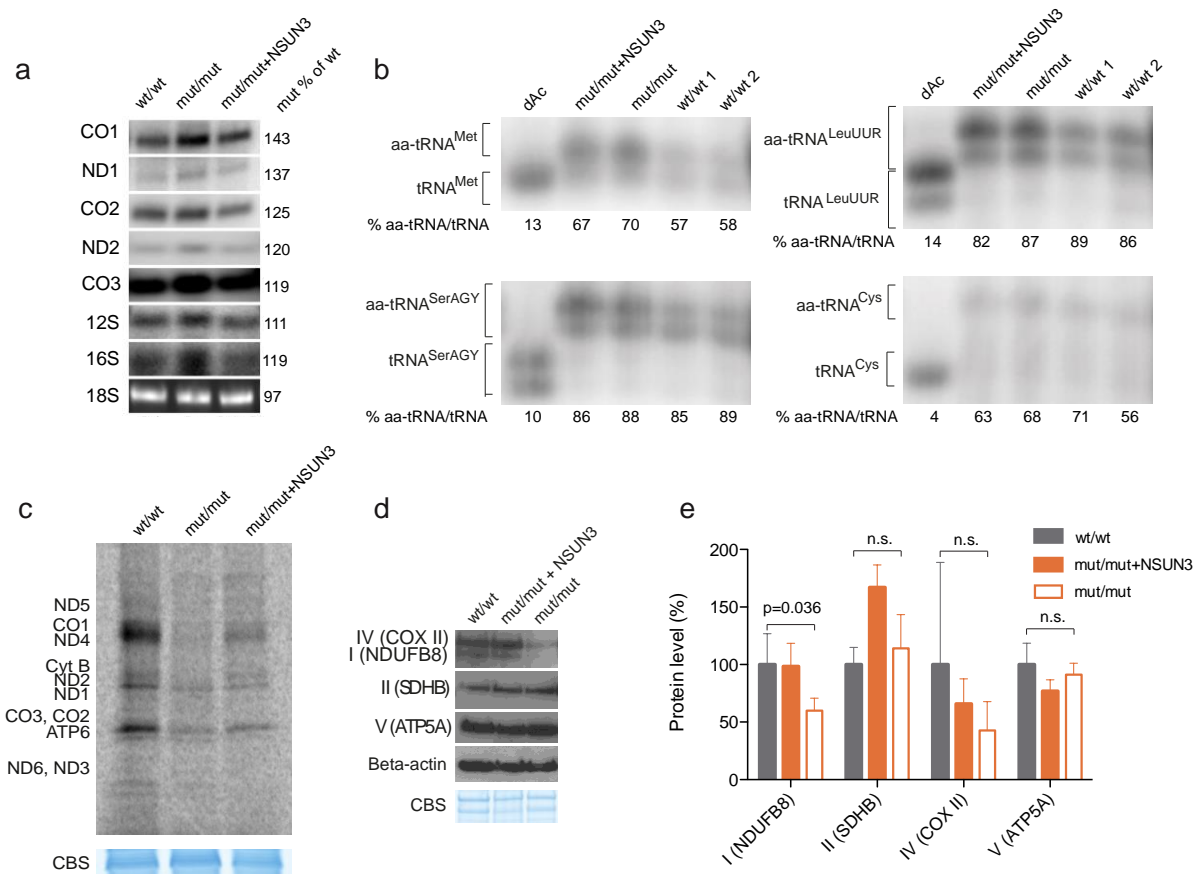

### Supplementary Fig. 1:

(a) Northern blot analysis of mature mt-mRNA. 18S is used as loading control.  
 (b) Analysis of aminoacyl tRNAs by northern blotting and the percentage of aminoacylated tRNA relative to nonaminoacylated tRNA.  
 (c) Additional <sup>35</sup>S metabolic labelling to assess mitochondrial *de novo* protein translation.  
 (d) Representative example of western blot analysis of NDUFB8, SDHB, COX II, and ATP5A for wt/wt, mut/mut + NSUN3 and mut/mut, cells. CBS: Coomassie blue staining.  
 (e) Quantification of 3 western blot experiments for NDUFB8, SDHB, COX II, and ATP5A for wt/wt, mut/mut + NSUN3 and mut/mut cells. Data were statistically analysed by two-tailed Student's t-Test. Error bars represent standard deviation of the mean.

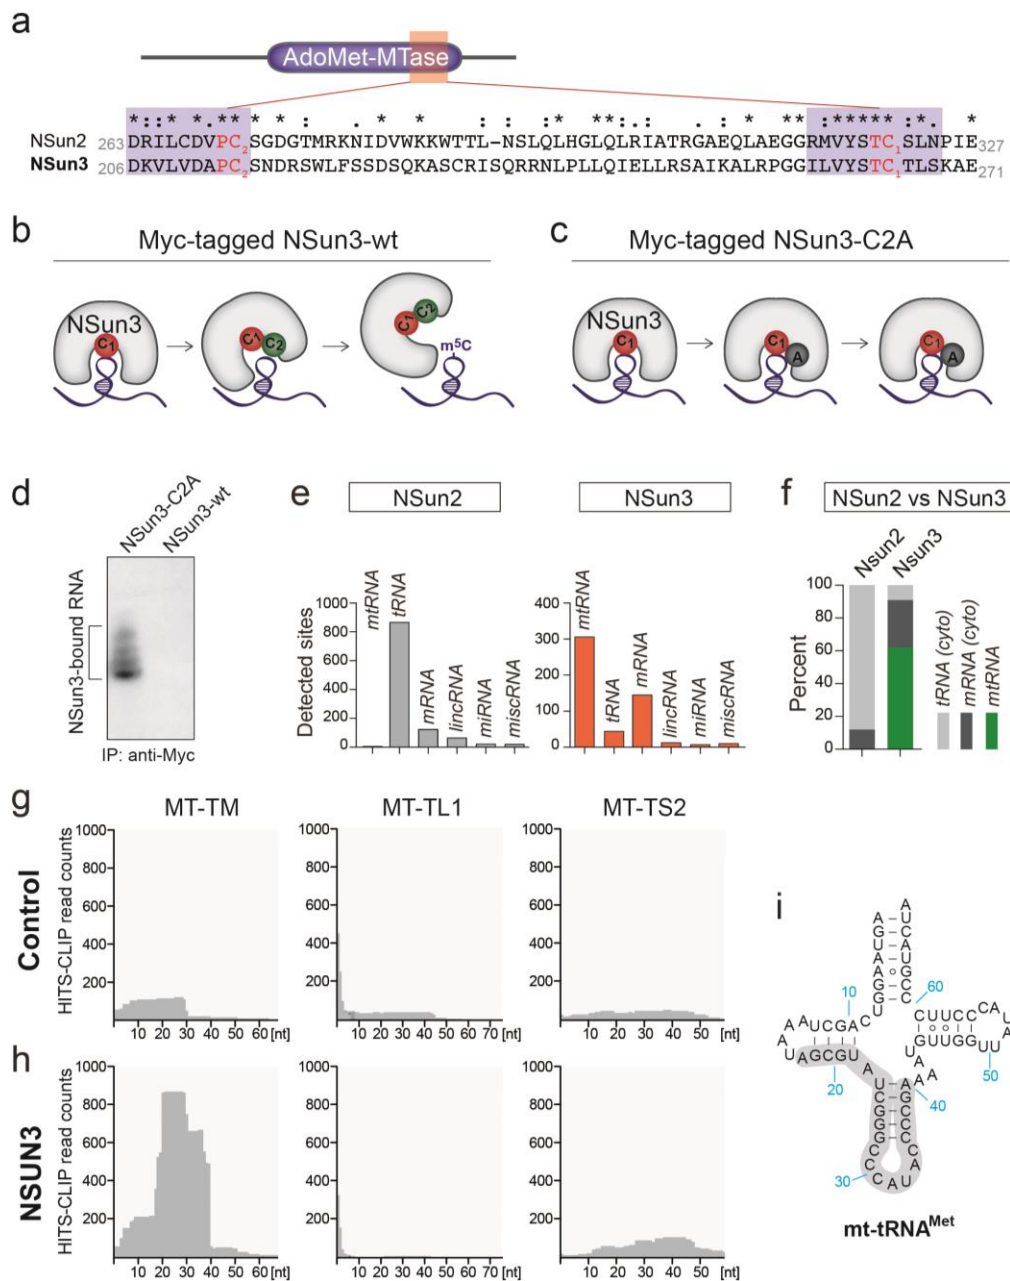

### Supplementary Fig. 2:

(a) Sequence alignment of S-adenosylmethionine-dependent methyltransferase domain (AdoMet-MTase) of NSun2, and 3. Red letters indicate the catalytic active sites. Cysteine (C<sub>2</sub>) is mutated to generate the miCLIP constructs.

(b-c) Schematic representation of the NSun3-mediated formation of m<sup>5</sup>C (b) or the covalent bond at the methylated site in the C2 mutant (NSun3-C2A) (c).

(d) RNA released after NSun3 immunoprecipitation and RNase treatment resolved in a polyacrylamide gel. C2A: construct carrying the point C2>A mutation; wt: wild-type construct.

(e) Number of sites in mitochondrial RNA, nuclear-encoded tRNA, mRNA, long intervening noncoding RNAs (lincRNA), miRNA, miscellaneous RNA (miscRNA) targeted by NSun2 (left hand panel) or NSun3 (right hand panel).

(f) Percentage of sites in nuclear-encoded tRNA and mRNA, and in mtRNA targeted

(g-h) HITS-CLIP read counts (y-axis) and its position on tRNA MT-TM, MT-TL1 and MT-TS2 (x-axis) for an unrelated control (ENSG00000182362) (g) and for NSUN3 (h)

(i) Structure and sequence of MT-TM with the HITS-CLIP targeted region in grey.

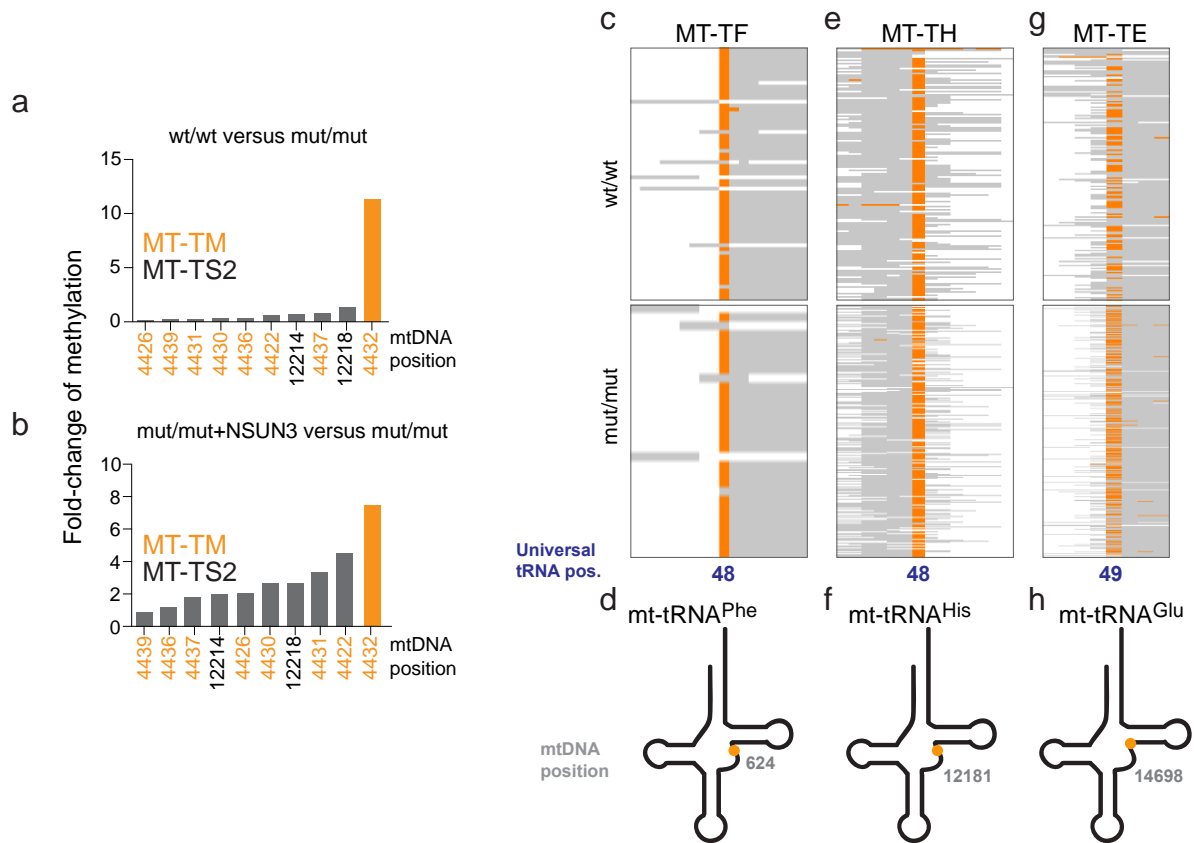

**Supplementary Fig. 3:**

(a-b) Fold-change of methylation at miCLIP sites ( $\pm 5$  nucleotides) in mitochondrially encoded tRNAs in wild-type dermal fibroblast (wt/wt) (a) and rescued patient fibroblast (mut/mut+NSUN3) (b) versus fibroblasts lacking NSun3 (mut/mut) (see Tab. S2).  
(c-e) Methylated (orange) and unmethylated (grey) cytosines (x-axis) and reads (y-axis) in wt/wt and mut/mut in MT-TF (c), MT-TH (d) and MT-TE (e).  
(f-h) Structure and position of  $m^5C$  (orange circle) in MT-TF (f), MT-TH (g) and MT-TE (h)

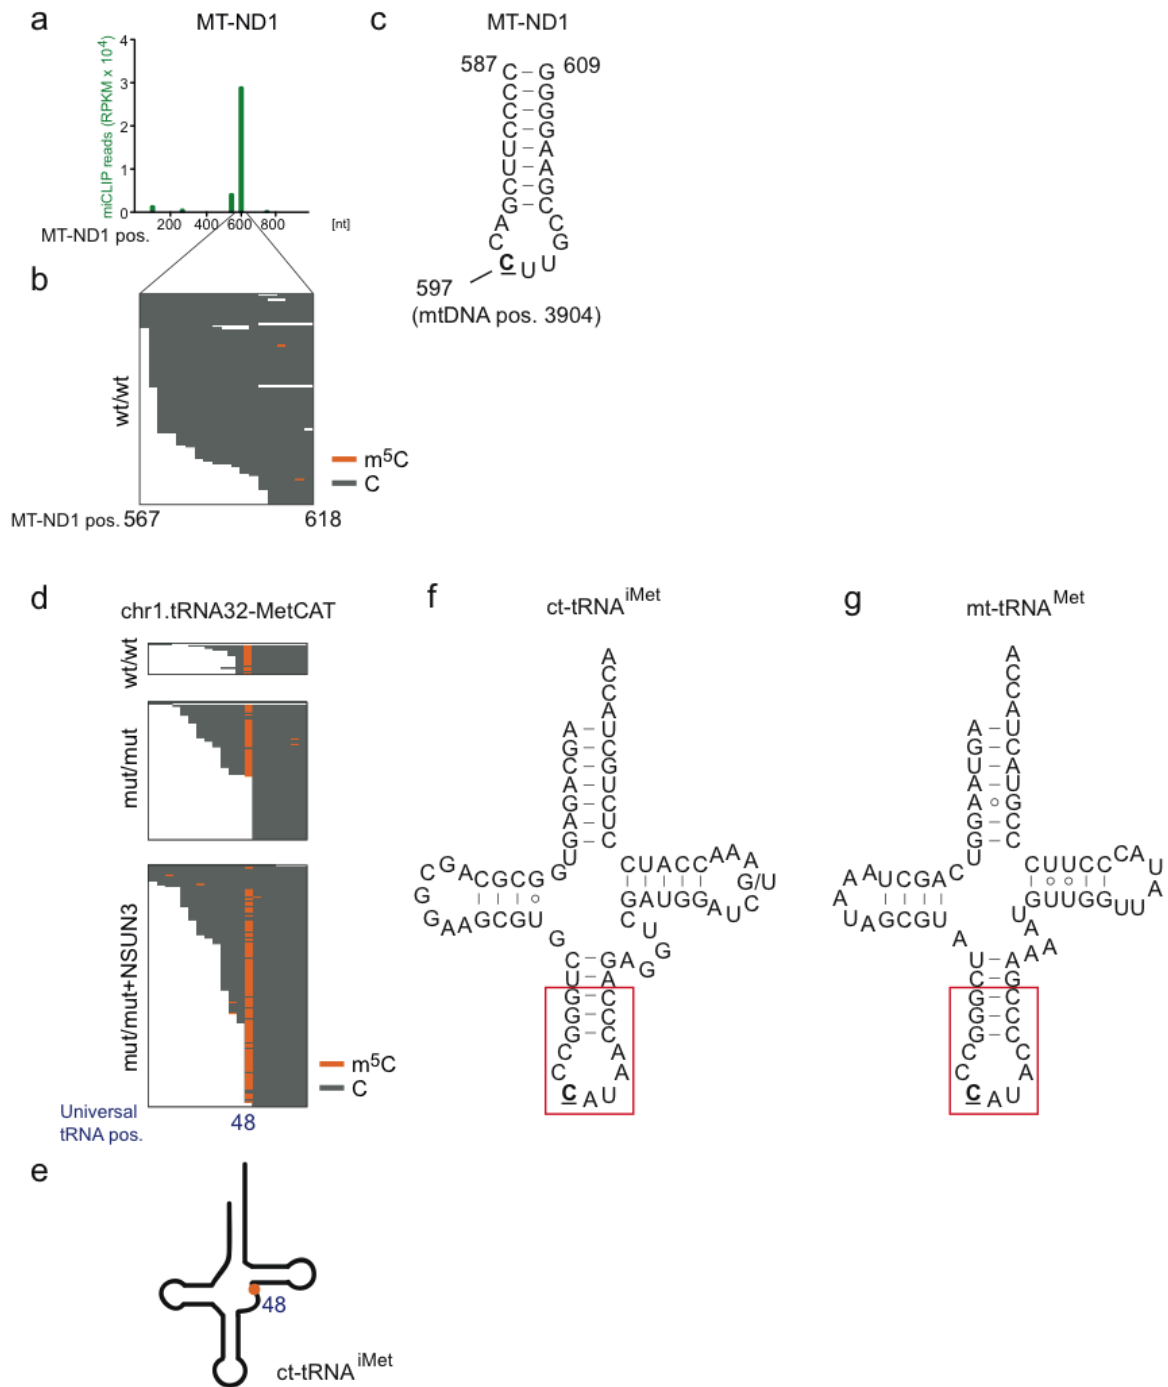

**Supplementary Fig. 4:**

- (a) miCLIP reads (green) corresponding to the MT-ND1 gene.
- (b) Methylated (orange) and unmethylated (grey) cytosines (x-axis) detected by BS RNA-Seq (individual reads on y-axis) for the region 567 - 618 of MT-ND1 for wt/wt.
- (c) Potential stem-loop structure in the MT-ND1 RNA (region 587-609). The cytosine at position equivalent to the universal tRNA position 34 is underlined.
- (d) Methylated (orange) and unmethylated (grey) cytosines (x-axis) detected by BS RNA-Seq (individual reads on y-axis) for the cytoplasmic (ct-) tRNA<sup>iMet</sup> gene for wt/wt, mut/mut and mut/mut+NSUN3 cells.
- (e) Structure and position of m<sup>5</sup>C (orange circle) in ct- tRNA<sup>iMet</sup>.
- (f-g) The clover leaf structure and sequence of human ct-tRNA<sup>iMet</sup> (f) and mt-tRNA<sup>Met</sup> (g). The red box indicates the similarity in the anticodon loop between the two species. The cytosine at the universal tRNA position 34 is underlined.

a

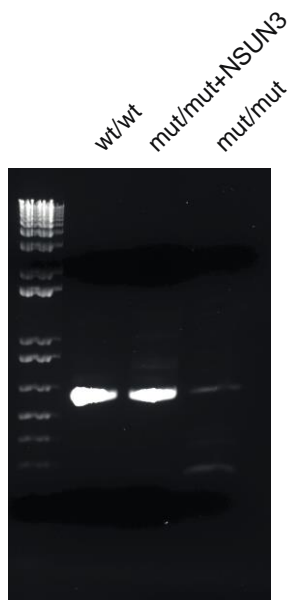

b

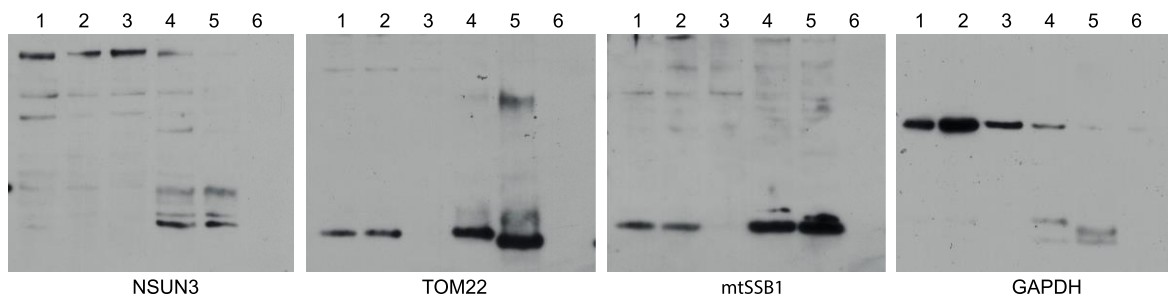

**Supplementary Fig. 5:**

(a) Source data - gel electrophoresis Fig. 1C. (b) Source data - western blots shown in Fig. 1g

a

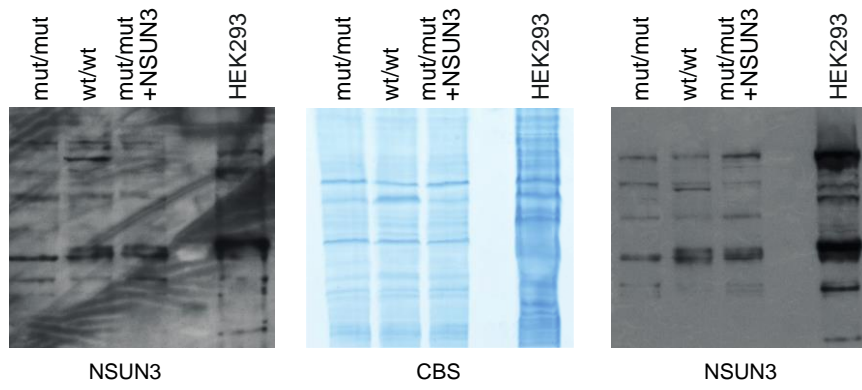

b

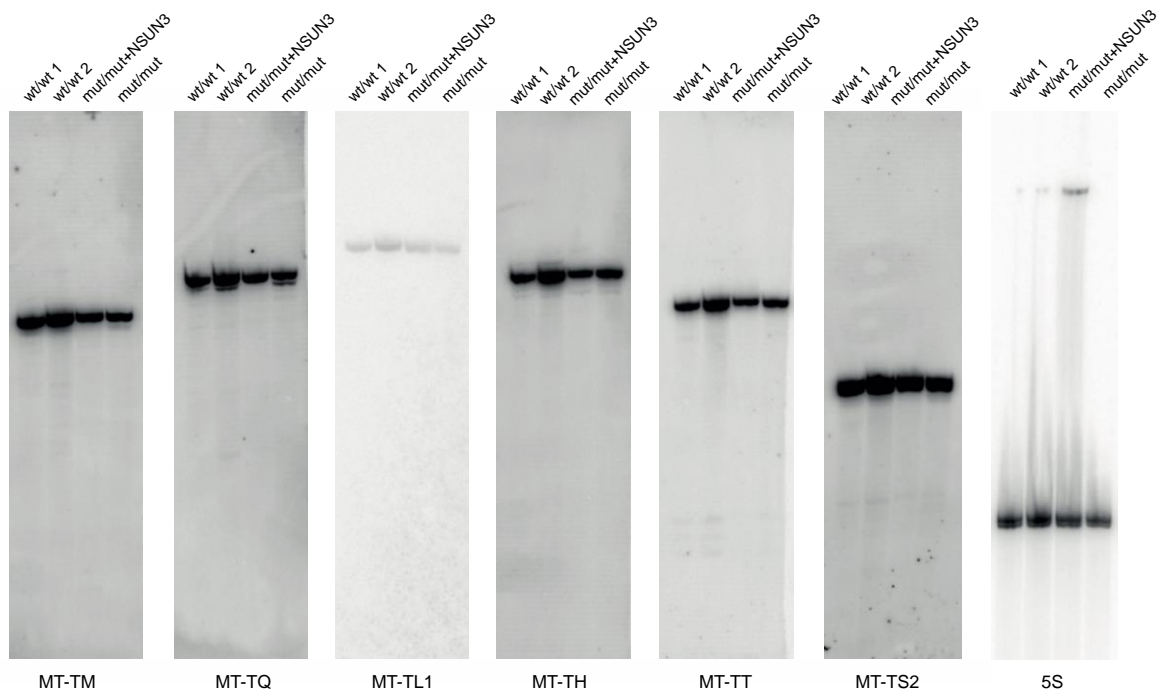

c

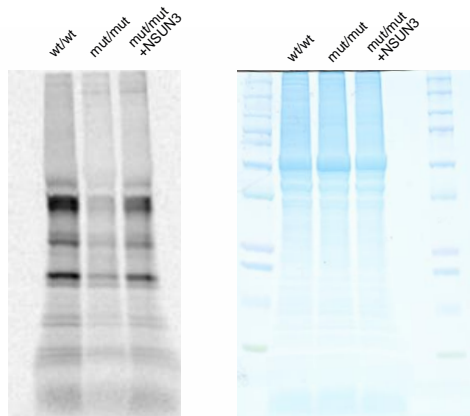

**Supplementary Fig. 6:**

(a) Source data - western blots shown in Fig. 2a. (b) Source data - northern blots shown in Fig. 2f. (c) Source data - 35S labelling shown in Fig. 2g

| Gene   | Human mtDNA position | Position (tRNAdb) | Location       | Bovine           | Human                                   | Reference                   |
|--------|----------------------|-------------------|----------------|------------------|-----------------------------------------|-----------------------------|
| MT-TF  | 624                  | 48                | Variable loop  | not C            | <b>m<sup>5</sup>C</b>                   |                             |
| MT-TL1 | 3279                 | 48                | Variable loop  | m <sup>5</sup> C | <u>m<sup>5</sup>C</u>                   | Suzuki 2014<br>Helm 1999    |
| MT-TM  | 4432                 | 34                | Anticodon loop | f <sup>5</sup> C | <b>m<sup>5</sup>C</b> /f <sup>5</sup> C | Suzuki 2014                 |
| MT-TW  | 5557                 | 48                | Variable loop  | m <sup>5</sup> C | not C                                   | Suzuki 2014                 |
| MT-TN  | 5682                 | 48                | Variable loop  | m <sup>5</sup> C | not C                                   | Suzuki 2014                 |
| MT-TH  | 12181                | 48                | Variable loop  | not C            | <b>m<sup>5</sup>C</b>                   |                             |
| MT-TS2 | 12239                | 48                | Variable loop  | n.d.             | <u>m<sup>5</sup>C</u>                   | Squires 2012                |
|        | 12240                | 49                | T-stem         | m <sup>5</sup> C | <u>m<sup>5</sup>C</u>                   | Suzuki 2014<br>Squires 2012 |
|        | 12241                | 50                | T-stem         | n.d.             | <u>m<sup>5</sup>C</u>                   | Squires 2012                |
| MT-TE  | 14698                | 49                | T-stem         | m <sup>5</sup> C | <u>m<sup>5</sup>C</u>                   | Squires 2012                |
| MT-TT  | 15952                | 72                | Acc-stem       | m <sup>5</sup> C | n.d.                                    | Suzuki 2014                 |

n.d. – cysteine present, but methylation not detected.

Novel m<sup>5</sup>C in human mt-tRNAs detected in this work are indicated in red.

Previously identified m<sup>5</sup>C in human mt-tRNA and confirmed in this study are underlined

**Supplementary Table 1:** Cytosine-5 methylation in mammalian mitochondrial tRNA

| NSun3 cDNA constructs                                                          |         |                                                      |
|--------------------------------------------------------------------------------|---------|------------------------------------------------------|
| miCLIP mutant                                                                  |         |                                                      |
| forward                                                                        |         | GTG TTA GTG GA TGC TCC GGC TTC AAA TGA TCG AAG CTG G |
| reverse                                                                        |         | CCA GCT TCG ATC ATT TGA AGC CGG AGC ATC CAC TAA CAC  |
| Overexpression in human mut/mut fibroblasts and cloning into pLenti6,3/V5-TOPO |         |                                                      |
| forward                                                                        |         | CGC CAT GCT GAC CCA GCT GAA AG                       |
| reverse                                                                        |         | TCA CCA TTT TCC TGT GCT CCA TG                       |
| Nsun3-V5 forward                                                               |         | CGC CAT GCT GAC CCA GCT GAA AG                       |
| NSun3-V5 reverse                                                               |         | CTA CGT AGA ATC GAG ACC GAG                          |
| Overexpression in HeLa cells: cloning into pcDNA5-FST2                         |         |                                                      |
| forward                                                                        |         | CAG ACG GTA CCA TGC TGA CCC AGC TGA AAG C            |
| reverse                                                                        |         | ACG TCC TCG AGT TTT CCT GTG CTC CAT GAT T            |
| mtDNA copy number determination                                                |         |                                                      |
| mtDNA forward                                                                  |         | CAC CCA AGA ACA GGG TTT GT                           |
| mtDNA reverse                                                                  |         | TGG CCA TGG GTA TGT TGT TAA                          |
| mtDNA probe                                                                    |         | 6-Fam-TTA CCG GGC TCT GCC ATC T-Tamra                |
| Genomic (B2M) forward                                                          |         | TGC TGT CTC CAT GTT TGA TGT ATC T                    |
| Genomic (B2M) reverse                                                          |         | TCT CTG CTC CCC ACC TCT AAG T                        |
| Genomic (B2M) probe                                                            |         | 6-Fam-TTG CTC CAC AGG TAG CTC TAG GAG G-Tamra        |
| Deletion analysis                                                              |         |                                                      |
| DNA                                                                            |         |                                                      |
| PCR forward                                                                    |         | TAG GCA CAT GAT GCA AGC CA                           |
| PCR reverse                                                                    |         | GAG GGA CAT AGC CTT CAG CC                           |
| Sanger sequencing                                                              |         | GAT GTA CTG CAG GGA GGG ACT AA                       |
| RNA (PCR and Sanger sequencing)                                                |         |                                                      |
| forward                                                                        |         | CAG AGG GGA AGC TTG CAA AAC                          |
| reverse                                                                        |         | ACA CGG AGC ATC CAC TAA CA                           |
| Mitochondrial RNA analysis                                                     |         |                                                      |
| GAPDH                                                                          | forward | GAA GGT GAA GGT CGG AGT CAA C                        |
|                                                                                | reverse | CAG AGT TAA AAG CAG CCC TGG T                        |
|                                                                                | probe   | 6-Fam-GTT TGG TCC GTA TTG GGC GCC T-Tamra            |
| CO1                                                                            | forward | CGA TGC ATA CAC CAC ATG AA                           |
|                                                                                | reverse | AGC GAA GGC TTC TCA AAT CA                           |
|                                                                                | probe   | 6-Fam-GGC TCA TTC ATT TCT CTA ACA GC-Tamra           |
| CO2                                                                            | forward | CGT CTG AAC TAT CCT GCC CG                           |
|                                                                                | reverse | TGG TAA GGG AGG GAT CGT TG                           |
|                                                                                | probe   | 6-Fam-CGC CCT CCC ATC CCT ACG CAT C-Tamra            |
| 16S rRNA                                                                       | forward | TTT GCA AGG AGA GCC AAA GC                           |
|                                                                                | reverse | AGA CGG GTG TGC TCT TTT AGC T                        |
|                                                                                | probe   | 6-Fam-AGA CCC CCG AAA CCA GAC GAG CTA CC-Tamra       |
| 12S rRNA                                                                       | forward | CCC CAG GTT GGT CAA TTT C                            |
|                                                                                | reverse | CGG CTT CTA TGA CTT GGG TTA A                        |
|                                                                                | probe   | 6-Fam-TGC AGC CAC CGC GGT CA-Tamra                   |

**Supplementary Table 2: Sequences of primers and probes**



## Supplementary Note 1:

### Clinical and Biochemical Characterisation of the Patient

#### Patient

Mitochondrial disorder, combined developmental disability, microcephaly, failure to thrive, recurrent increased lactate levels in plasma, muscular weakness, proximal accentuated, external ophthalmoplegia, convergence nystagmus

Age of onset: 3. Month of life

#### Muscle histochemistry and respiratory chain analyses

The functional analysis of unfrozen muscle biopsy by radiochemical substrate oxidation (see Table 1) demonstrated normal protein activities. The ratio of the reactions forming considerable amounts of reduction equivalents (e.g. Pyruvate+Malate/Pyruvate+Carnitine) was slightly suspicious. The isolated measurement of the respiratory chain complexes (see Table 2) revealed a noticeable decrease in cytochrome c oxidase as well as a slight decrease in complex I and III. The reduction of complex IV was also seen in western blot analysis. The measurement of the relative mtDNA content using quantitative real-time PCR showed normal levels.

| <b>Substrate oxidation of the 600g fraction of unfrozen muscle homogenate</b> |     |              |     |     |                   |           |              |      |      |      |
|-------------------------------------------------------------------------------|-----|--------------|-----|-----|-------------------|-----------|--------------|------|------|------|
| [nmol/h/mg protein]                                                           |     | Normal range |     |     | [nmol/h/mUnit CS] |           | Normal range |      |      |      |
| [1-14C]Pyruvate+Malate                                                        | 579 | 263          | -   | 900 | P+M/CS            | 1,96      | 1,54         | -    | 3,55 |      |
| [1-14C]Pyruvate+Carnitine                                                     | 779 | 302          | -   | 856 | P+C/CS            | 2,64      | 1,65         | -    | 3,66 |      |
| [1-14C]Pyruvate+Malate-ADP                                                    | 104 | 32           | -   | 102 | P+M-              | 0,35      | 0,21         | -    | 0,41 |      |
| [U-14C]Malate+Pyruvate+Malonate                                               | 665 | 282          | -   | 874 | M+P+Mal/C         | 2,25      | 1,56         | -    | 3,87 |      |
| [U-14C]Malate+Acetylcarn.+Malonate                                            | 784 | ↑            | 273 | -   | 678               | M+AC+Mal/ | 2,66         | 1,16 | -    | 2,82 |
| [U-14C]Malate+Acetylcarn.+Arsenite                                            | 428 | ↑            | 156 | -   | 378               | M+AC+As/C | 1,45         | 0,57 | -    | 1,52 |
| [U-14C]Glutamate+Acetylcarnitine                                              | 269 | ↑            | 86  | -   | 209               | G+AC/CS   | 0,91         | 0,35 | -    | 1,06 |

| <b>Enzyme measurements of the 600g fraction of unfrozen muscle homogenate</b> |      |              |     |      |                   |         |              |       |      |      |      |
|-------------------------------------------------------------------------------|------|--------------|-----|------|-------------------|---------|--------------|-------|------|------|------|
| [nmol/h/mg protein]                                                           |      | Normal range |     |      | [nmol/h/mUnit CS] |         | Normal range |       |      |      |      |
| Citrate synthase (CS)                                                         | 295  | 150          | -   | 338  |                   |         |              |       |      |      |      |
| Complex I (CI)                                                                | 26   | 28           | -   | 76   | CI/CS             | 0,09    | ↓            | 0,14  | -    | 0,35 |      |
| Complex I+III (C13)                                                           | 114  | 49           | -   | 218  | C13/CS            | 0,38    |              | 0,24  | -    | 0,81 |      |
| Complex II (CII)                                                              | 71   | 33           | -   | 102  | CII/CS            | 0,24    |              | 0,18  | -    | 0,41 |      |
| Complex II+III (C23)                                                          | 153  | 65           | -   | 180  | C23/CS            | 0,52    |              | 0,30  | -    | 0,67 |      |
| Complex III (CIII)                                                            | 220  | ↓            | 304 | -    | 896               | CIII/CS | 0,74         | ↓     | 1,45 | -    | 3,76 |
| Cytochrom c Oxidase (COX)                                                     | 118  | ↓            | 181 | -    | 593               | COX/CS  | 0,40         | ↓     | 0,91 | -    | 2,24 |
| Complex V (CV)                                                                | 230  | 86           | -   | 257  | CV/CS             | 0,78    |              | 0,42  | -    | 1,26 |      |
| Pyruvate dehydrogenase (PDHC)                                                 | 21,0 | 5,3          | -   | 19,8 | PDHC/CS           | 0,071   |              | 0,026 | -    | 0,07 |      |

## Supplementary References:

Jühling F, Mörl M, Hartmann RK, Sprinzl M, Stadler PF, and Pütz J. (2009) tRNAdb 2009: compilation of tRNA sequences and tRNA genes. *Nucleic Acids Res.*, **37**: Database issue: D159-D162.

Helm M, Florentz C, Chomyn A, Attardi G. (1999) Search for differences in post-transcriptional modification patterns of mitochondrial DNA-encoded wild-type and mutant human tRNALys and tRNALeu(UUR). *Nucleic Acids Res.* **27**:756-63.

Squires JE, Patel HR, Nousch M, Sibbritt T, Humphreys DT, Parker BJ, Suter, CM and Preiss T. (2012) Widespread occurrence of 5-methylcytosine in human coding and non-coding RNA. *Nucleic Acids Res.* **40**: 5023–5033.

Suzuki T and Suzuki T. A complete landscape of post-transcriptional modifications in mammalian mitochondrial tRNAs. (2014) *Nucleic Acids Res.* **42**: 7346–7357.
